# Supplementary material for: Composite microspheres with PAM microgel core and polymerisable surfactant/polyoxometalate complexes shell
Source: Royal Society of Chemistry journal article supplement (doi:10.1039/b823075g), 2009-01-01

## Composite Microspheres with PAM Microgel Core and Polymerisable Surfactant/Polyoxometalate Complexes Shell

Hong Li<sup>a,b</sup>, Ping Zhang<sup>c</sup>, Long Zhang<sup>a</sup>, Tong Zhou<sup>a</sup>, Daodao Hu<sup>a\*</sup>

<sup>a</sup> School of Chemistry and Materials Science, Shaanxi Normal University, Xi'an, Shaanxi 710062, People's Republic of China

<sup>b</sup> College of Environment and Chemical Engineering, Xi'an Polytechnic University, Xi'an, Shaanxi 710048, People's Republic of China

<sup>c</sup> Xi'an Polytechnic University, Xi'an, Shaanxi 710048, People's Republic of China

To whom correspondence should be addressed. E-mail: daodaohu@snnu.edu.cn

### Electronic Supplementary Information

**Figure 1.** SEM images of the PAM/APDDAB-PWA composite microspheres prepared using the porous PAM microspheres (cross-linker BS: 0.06 g) as templates. The weight ratio of APDDAB to PAM microgels: 5% (A, B); 10% (C, D); 30% (E, F); 50% (G, H). Without ultrasonication (A, C, E, G); with ultrasonication (B, D, F, H).

**Figure 2.** XPS spectrum of the PAM/APDDAB-PWA composite microspheres.

**Figure 3.** Thermogravimetric analysis of PAM microgels (a), the PAM/APDDAB-PWA composite microsphere (b) and APDDAB-PWA complexes (c).

**Figure 4.** EDX spectrum of the PAM/APDDAB-PWA composite microspheres.

**Figure 1.** SEM images of the PAM/APDDAB-PWA composite microspheres prepared using the porous PAM microspheres (cross-linker BS: 0.06 g) as templates. The weight ratio of APDDAB to PAM microgels: 5% (A, B); 10% (C, D); 30% (E, F); 50% (G, H). Without ultrasonication (A, C, E, G); with ultrasonication (B, D, F, H).

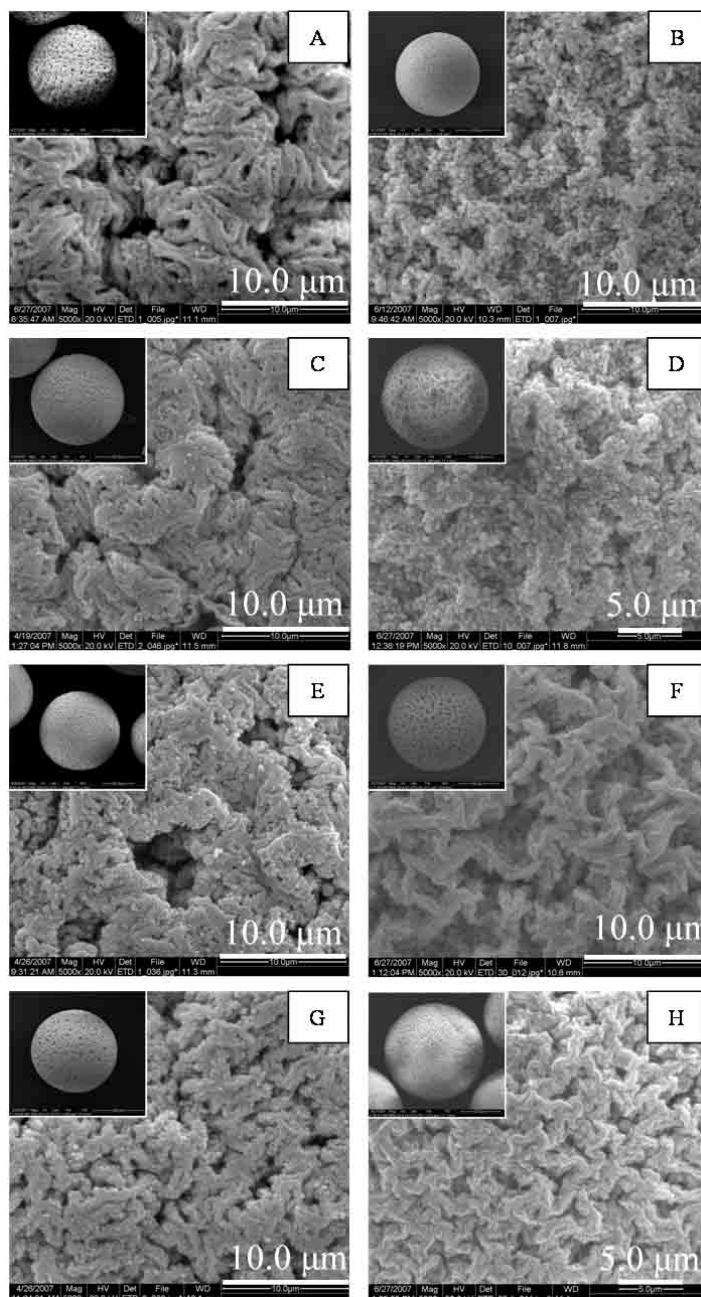

**Figure 2.** XPS spectrum of the PAM/APDDAB-PWA composite microspheres (Inlet: -NH and N<sup>+</sup>).

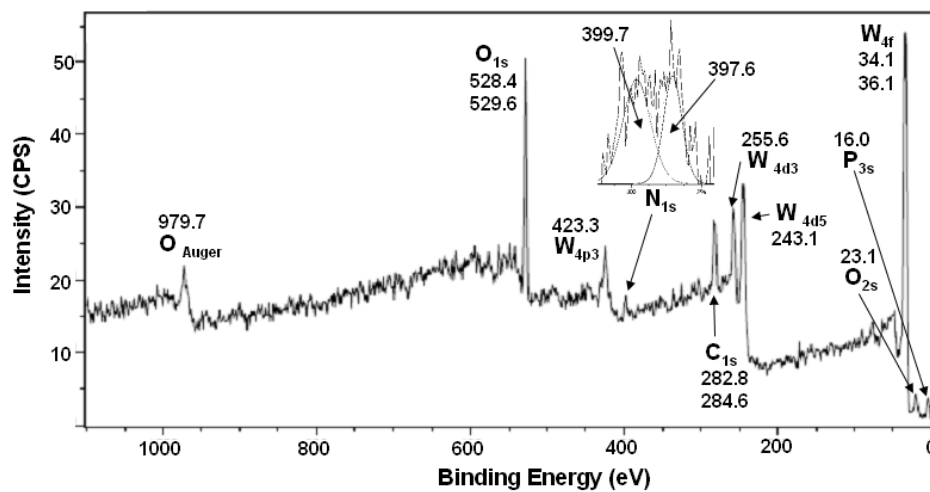

**Figure 3.** Thermogravimetric analysis of typical PAM microgels (a), the PAM/APDDAB-PWA composite microsphere (b) and APDDAB-PWA complexes (c).

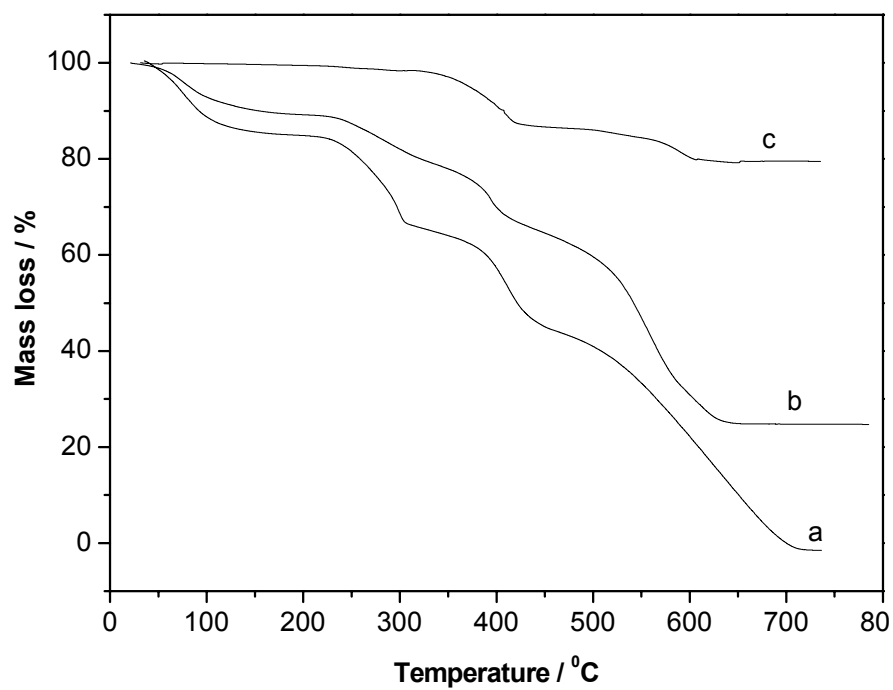

**Figure 4.** EDX spectrum of the PAM/APDDAB-PWA composite microspheres.

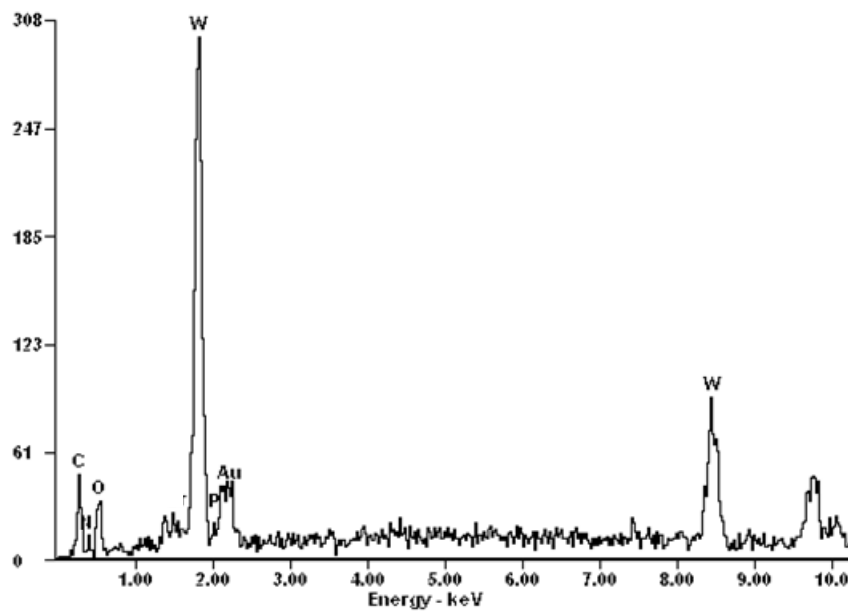

Supplement: b823075g.pdf [file b823075g.pdf]
